# Supplementary material for: Hydrogenation of hydrophobic substrates catalyzed by gold nanoparticles embedded in Tetronic/cyclodextrin-based hydrogels
Source: Royal Society of Chemistry journal article supplement (doi:10.1039/c8nj06081a), 2019-01-01
Supplement: c8nj06081a1.pdf [file c8nj06081a1.pdf]

## Supporting Information

### Hydrogenation of hydrophobic substrates catalyzed by gold nanoparticles embedded in Tetronics/cyclodextrins-based hydrogels

Mélanie Chevry <sup>a</sup>, Stéphane Menuel<sup>a</sup>, Bastien Léger<sup>a,\*</sup>, Sébastien Noël<sup>a</sup>, Eric Monflier<sup>a</sup>, Frédéric Hapiot<sup>a,\*</sup>

<sup>a</sup> Univ. Artois, CNRS, Centrale Lille, ENSCL, Univ. Lille, UMR 8181, Unité de Catalyse et de Chimie du Solide (UCCS), F-62300 Lens, France. E-mail: [bastien.leger@univ-artois.fr](mailto:bastien.leger@univ-artois.fr); [frederic.hapiot@univ-artois.fr](mailto:frederic.hapiot@univ-artois.fr)

|                                                                                                                                                                                            | Page |
|--------------------------------------------------------------------------------------------------------------------------------------------------------------------------------------------|------|
| Figure S1. Photographs of reaction medium for each step of the synthesis of AuNP@ $\alpha$ -CD/Tetronics®90R4 hydrogel                                                                     | 2    |
| Figure S2. TEM image of Au NPs embedded in Tetronics®90R4 after a) 30 min, b) 60 min, and c) 90 min                                                                                        | 3    |
| Figure S3. Viscosity curves as a function of temperature of $\alpha$ -CD/Tetronics®90R4 hydrogel without AuNP and $\alpha$ -CD/Tetronics®90R4 hydrogel with AuNP                           | 4    |
| Figure S4. TEM image of Au NPs embedded in $\alpha$ -CD/Tetronics®90R4 hydrogel after ten consecutive heat and cool cycles (from room temperature to 50 °C)                                | 5    |
| Figure S5. a) TEM image of Au NPs embedded in $\alpha$ -CD/Tetronics®90R4 hydrogel at a magnification of 490K ; b) Reduced FFT-derived diffraction pattern in a typical crystalline region | 5    |
| Characterization of the organic phase                                                                                                                                                      | 6    |

**Fig. S1** Photographs of reaction medium for each step of the synthesis of AuNP@ $\alpha$ -CD/Tetronics®90R4 hydrogel.

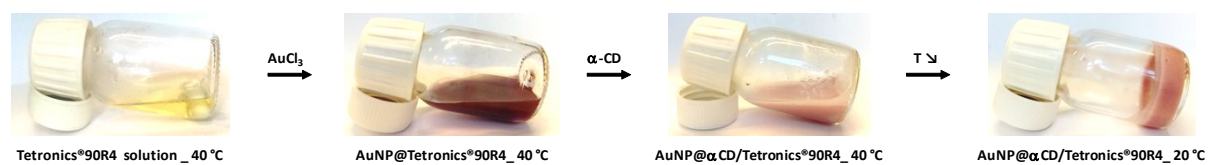

**Fig. S2** TEM image of Au NPs embedded in Tetronics®90R4 after a) 30 min, b) 60 min, and c) 90 min.

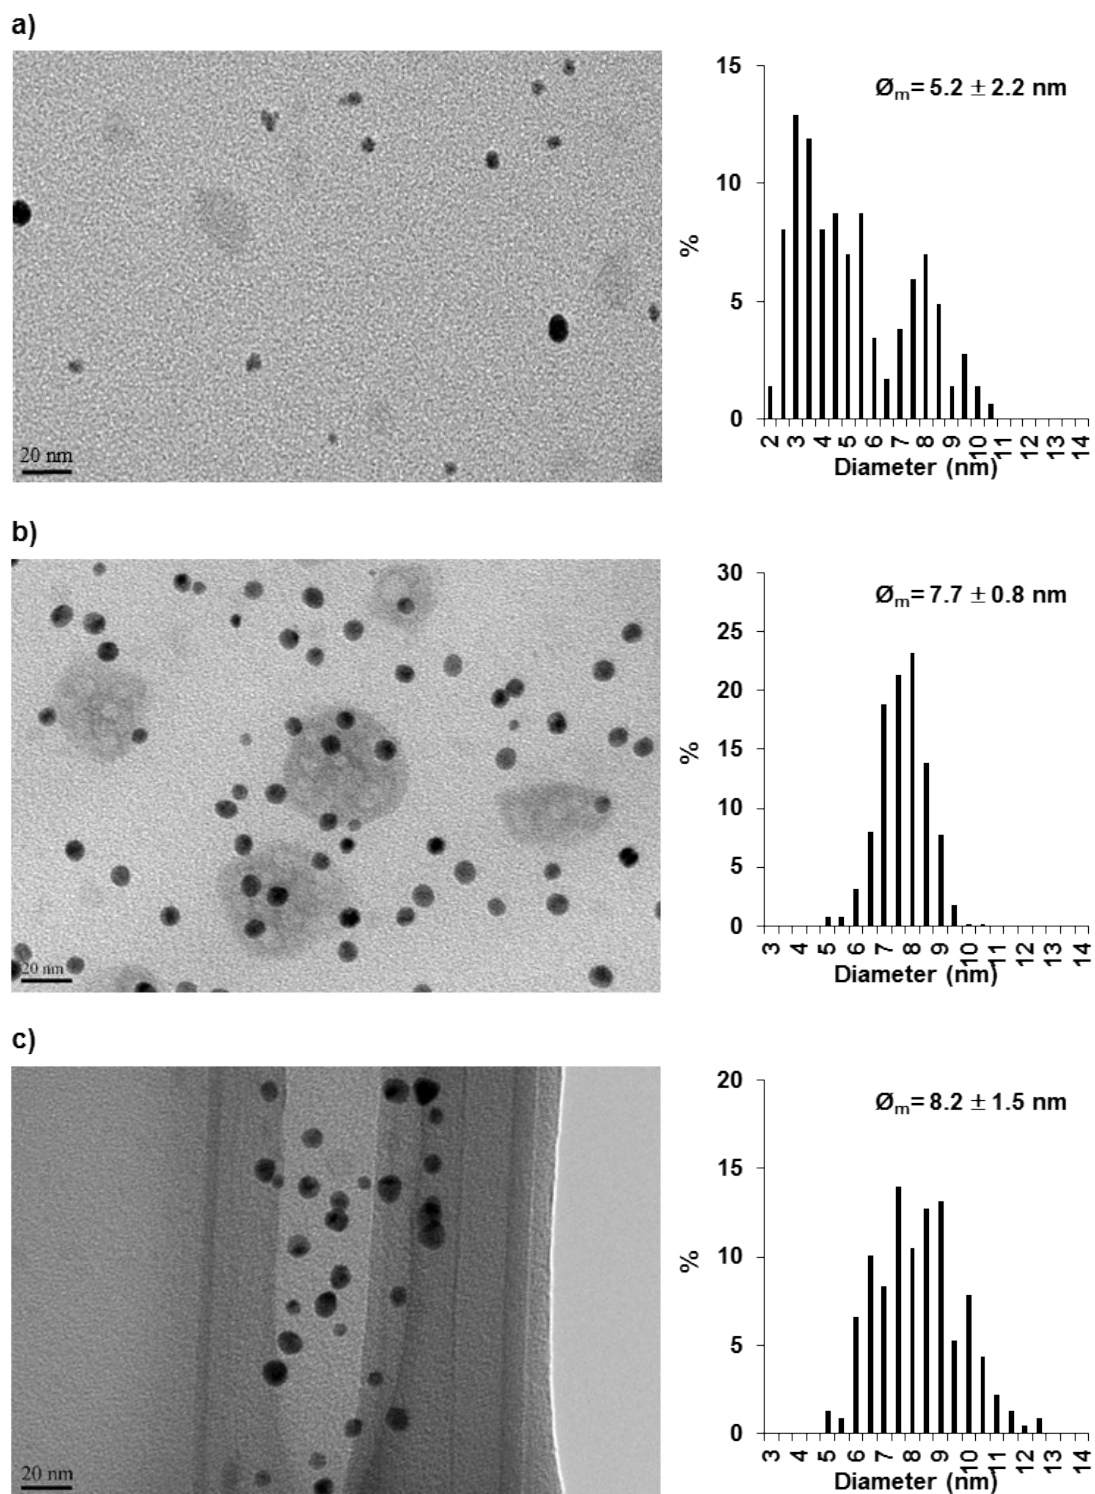

**Fig. S3** Viscosity curves as a function of temperature of  $\alpha$ -CD/Tetronics®90R4 hydrogel without AuNP (♦) and  $\alpha$ -CD/Tetronics®90R4 hydrogel with AuNP (●).

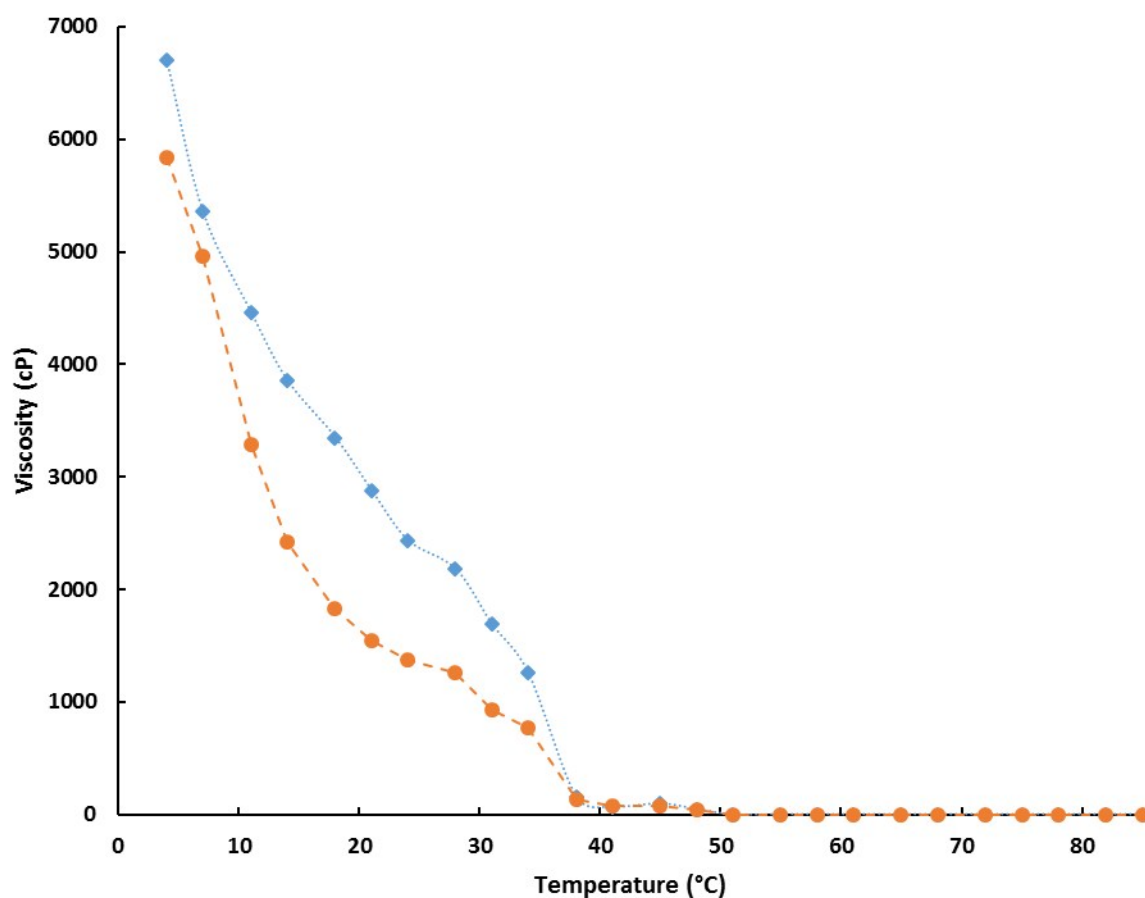

While a small drop of viscosity could be observed below the sol/gel transition temperature upon addition of AuNPs, no variation was noticed above. Accordingly, the viscosity did not influence the catalytic performance.

**Fig. S4** TEM image of Au NPs embedded in  $\alpha$ -CD/Tetronics®90R4 hydrogel after ten consecutive heat and cool cycles (from room temperature to 50 °C).

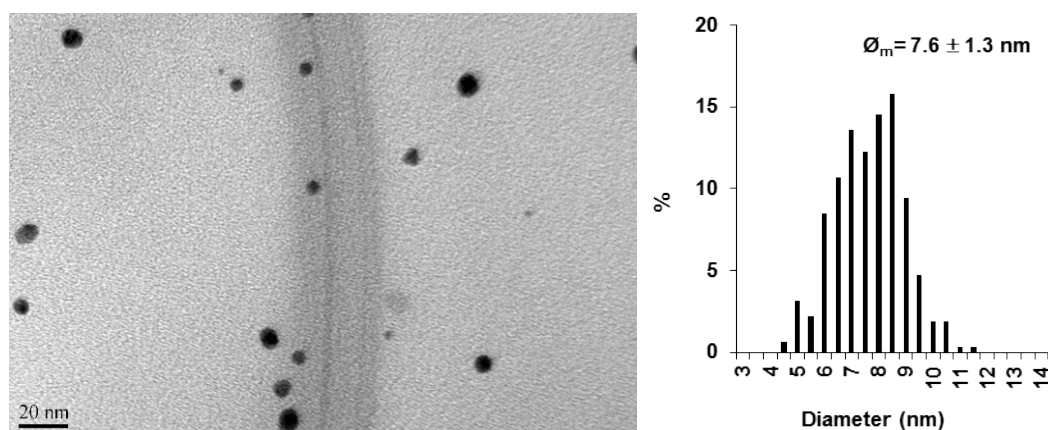

**Fig. S5** a) TEM image of Au NPs embedded in  $\alpha$ -CD/Tetronics®90R4 hydrogel at a magnification of 490K. b) Reduced FFT-derived diffraction pattern in a typical crystalline region.

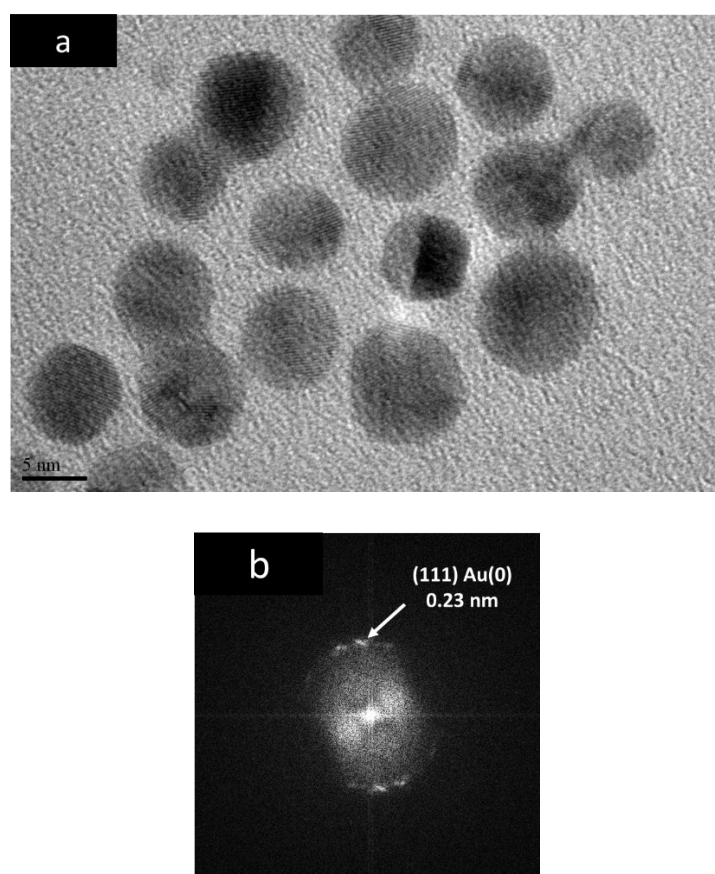

### **Characterization of the organic phase**

The characterization of the organic phase during a catalytic run and for the recyclability study was done by gas chromatography. The reaction composition was determined after taking 0.25 mL of the reaction mixture which was diluted in 1 mL of water. The organic products were extracted with 0.5 mL of chloroform and analyzed by gas chromatography using a Varian 3900 gas chromatograph, equipped with a CP-Sil-5B (30 m × 0.25 mm × 0.25 μm) and a flame ionization detector, using decane or dodecane as external standard.
